# Supplementary material
Source: PubMed Central journal article supplement (PMC6377488)
Supplement: pnas.1818812116.sapp.pdf [file pnas.1818812116.sapp.pdf]

## Supplementary Information for

Mutual interplay between IL-17 producing  $\gamma\delta$ T cells and microbiota orchestrates oral mucosal homeostasis

Anneke Wilharm, Yaara Tabib, Maria Nassar, Annika Reinhardt, Gabriel Mizraji, Inga Sandrock, Oded Heyman, Joana Barros-Martins, Yuval Aizenbud, Abed Khalaileh, Luba Eli-Berchoer, Eran Elinav, Asaf Wilensky, Reinhold Förster, Herve Bercovier, Immo Prinz, Avi-Hai Hovav

Avi-Hai Hovav and Immo Prinz

Email: [avihaih@ekmd.huji.ac.il](mailto:avihaih@ekmd.huji.ac.il) and [Prinz.Immo@mh-hannover.de](mailto:Prinz.Immo@mh-hannover.de)

### **This PDF file includes:**

Supplementary text  
Figs. S1 to S7  
Supplementary movie 1  
Supplementary References

## Supplementary Information Text

### Supplementary Material and Methods

#### Antibodies and reagents

The following fluorochrome-conjugated monoclonal antibodies and the corresponding isotype controls were purchased from BioLegend (San Diego, CA, USA):  $\gamma\delta$ TCR (GL3),  $\alpha\beta$ TCR(H57-597), I-A/I-E (M5/114.15.2), CD45.2 (104), CD45.1 (A20), langerin (4C7), Ly6G (1A8), Ly6C (HK1.4), CD3 (17A2), B220 (RA3-6B2), CD4 (GK1.5), CD11b (M1/70), CD11c (N418), IL-17A (TC11-18H10.1), IFN- $\gamma$  (XMG1.2), V $\gamma$ 4 (UC3-10A6), V $\gamma$ 1 (2.11), V $\gamma$ 5 (536), FOXP3 (MF-14), CD24 (30-F1), CD25 (3C7), CD27 (LG.3A10), CD62L (MEL-14), CD44 (IM7), CD69 (H1.2F3), CD103 (2E7), CD127 (A7R34) and CD122 (TM- $\beta$ 1). In some experiments antibodies against  $\alpha\beta$ TCR (REA 318), CD45.2 (104-2), CD3 (145-2C11) and CD44 (IM7.8.1) were obtained from Miltenyi, antibodies against CD45.2 (104), CD3 (145-2C11), CD44 (IM7), NK1.1 (PK136), IgM (RM7B4) and IFN- $\gamma$  (XMG1.2) were purchased from eBioscience and CCR6 (140706), CD27 (LG.3A10) and V $\gamma$ 5 (536) from BD Biosciences. The CD45 (30F11) was obtained from Invitrogen. Antibodies against V $\gamma$ 4 (49.2-9/100917D as well as 49.2-9/151111A),  $\gamma\delta$ TCR (GL3), B220 (RA3-3A1) and V $\gamma$ 6 (17D1) were produced in house using rat hybridoma cell lines.

#### Mice

CD45.2<sup>+</sup> C57BL/6 (B6) were purchased from Harlan (Rehovot, Israel). CD45.1<sup>+</sup> C57BL/6 (B6) and *Ccr6*<sup>gfp/gfp</sup> were purchased from the Jackson Laboratory (Bar Harbor, ME). *Tcrd-GDL* mice were bred in the animal facilities of Ein-Kerem medical school (Jerusalem, Israel) and the central animal facility at Hannover Medical School (Hannover, Germany).

*Cx3cr1<sup>gfp/gfp</sup>* were kindly provided by S. Jung (The Weizmann Institute, Israel). C57BL/6-Trdctm1Mal/J (*TcrdH2BeGFP*) mice (1), B6-Trdctm1MalRag1tm1.1Sadu, *Gt(ROSA)26Sortm1 (creERT2)Tyj* (*Indu-Rag1*×*Tcrd-H2BeGFP*) mice (2, 3), C57BL/6-*Il23rtm1Kuch* (here *Il23r<sup>gfp/gfp</sup>* or *Il23r<sup>gfp/+</sup>*) mice (4), B6.129S4-*Ifngtm3.1Lky* *Il17atm1Bcgen* (MGI:5426367, here *IL17eGFP*) mice, and C57BL/6 were bred and kept in the central animal facility at the Hannover Medical School (Hannover, Germany). The mice were maintained under SPF condition and analyzed between 8 and 12 weeks of age unless described else in the text. All animal protocols were approved by the Hebrew University Institutional Animal Care and Use Committee (IACUC) as well as in accordance with institutional guidelines of the Hannover Medical School approved by the Lower Saxony State Office for Consumer Protection and Food Safety animal care and use committee. GF or SPF adult B6 mice were maintained in sterile isolators at the Weizmann Institute or at the central animal facility at Hannover Medical School, the studies were approved by the IACUC of the Weizmann Institute of Science or Hannover Medical School, respectively.

### **Isolation and processing of gingival and skin $\gamma\delta$ T cells**

Gingival tissues were excised and epithelial sheets were prepared by pre-digestion of tissue with 2 mg/ml Dispase II (Roche Diagnostics) in PBS for 30 - 40 min at 37°C. The epithelium and sub-epithelium (lamina propria) were carefully separated with forceps under a binocular microscope. The tissues were then minced and treated with a collagenase type II (2 mg/ml; Worthington Biochemicals) and DNase I (1 mg/ml; Roche) solution in PBS plus 2% fetal calf serum (FCS) for 25 min at 37°C in a shaker bath. A total of 20  $\mu$ l

of 0.5 M EDTA per 2-ml sample was added to the digested tissues and incubated for an additional 10 min. Ear skin was excised, separated into two halves, and treated similarly, except that 1 mg/ml collagenase was used. Before staining the cells were washed and passed through a 70- $\mu$ m filter. For a whole gingival tissue analysis, the mice were perfused with PBS and then the upper jaws were extracted. Small blocks containing the teeth with the alveolar bone and the gingiva were prepared and digested by incubation with collagenase type IV (2 mg/ml; Worthington Biochemicals) and DNase I (1 mg/ml; Roche) in RPMI medium for 1h at 37°C and 1400 rpm in a shaker. The digestion was stopped by adding 0.0375 M EDTA and further incubation for 15 min under the same conditions. The gingival tissue was then removed from the teeth and bones and cut into very small pieces. The pieces were transferred within the digestion medium into a 100  $\mu$ m cell strainer. Tissue left overs were smashed with a plunger of a syringe and the filter was washed with 10 ml PBS + 4 mM EDTA and 3% FCS. Stained cells were run in LSR II (BD Biosciences) flow cytometer and further analyzed by FlowJo software (Tree Star). Dead cells were either visualized by DAPI staining or with Zombie Aqua Dead dye (BioLegend). In some experiments, FOXP3 staining was performed using the FOXP3 Fix/Perm Buffer Set (BioLegend), according to the manufacturer's instructions. For intracellular cytokine staining purified gingival cells were stimulated with phorbol myristate acetate (PMA) (1 mg/mL)/ionomycin (1 mg/mL) and Golgi Plug (2 mL/mL) for 8 hr. In some experiments the cells were incubated for 3 hr with PMA (50 ng/ml; Calbiochem), ionomycin (2 mg/ml; Invitrogen), and brefeldin A (1mg/ml; Sigma) at 37°C. The cells were then stained with CD45, CD3 and  $\gamma\delta$ TCR (GL3) antibodies, permeabilized using BD Cytofix/Cytoperm™ kit (DB Biosciences) and then stained with IL-17A and IFN- $\gamma$  antibodies.

## **Immunofluorescence staining**

For visualization of  $\gamma\delta$  T cells in the gingival tissue, the upper jaws were extracted and fixed in 4% PFA overnight. The next day the jaws were washed with PBS and then decalcified for one week in 0.5 M EDTA. The EDTA was changed every second day. Fixed and decalcified jaws were embedded in Tissue Tek® O.C.T™ Compound and frozen at -20°C. The frozen blocks were cut into 8  $\mu$ m sections by using the Leica cryotome, and then mounted on glass slides and dried for 30 min at 37°C. The sections were either stained with Eosin and Hematoxylin or stained for immunofluorescence microscopy in the following way: after rehydration with TBS-T for 10 min and blocking with 10% mouse serum in TBS-T for 30 min, the staining sections were stained with diluted primary antibodies for 1 hr at room temperature. After washing the nuclei were dyed with DAPI. Immunofluorescence microscopy was performed by using the Olympus fluorescence microscope with Color View IIIu camera (Olympus) and cellSens Dimension Software.

For a whole-mount staining of the gingival epithelium, the upper jaw was extracted and the gingival tissue was excised from the teeth and alveolar bones. The gingival tissue was incubated in Dispase (2 mg/ml; Roche) in PBS over night at 4°C. After Dispase treatment the gingival epithelium was carefully separated from the lamina propria. The gingival epithelium was fixed in 4% PFA for 10 min and then rehydrated in TBST for 30 min. Before staining with primary antibodies the epithelia were blocked with 10% mouse serum for 30 min. The primary antibody staining was performed for 1 hour at room temperature. Cell nuclei were further dyed with DAPI for 4 min and then the tissues were mounted on glass slides. Immunofluorescence microscopy was done as described above.

## **Two-photon microscopy**

For *in vivo* imaging mice were anesthetized and positioned supine on a warmed plate. The mouth of the mouse was carefully opened and the gingival tissue of the lower incisors was exposed by sticking down the lips. The TriM Scope (LaVision BioTec) with an upright Olympus BX51 microscope containing a 203/0.95 water immersion objective was used. For imaging pulsed Ti sapphire infrared laser (Mai Tai; SpectraPhysics) was turned to 920 nm. The Imaris software 7.7.2 (Bitplane) was used for data analysis.

## **RNA extraction and qRT-PCR**

For RNA isolation, the excised gingiva was homogenized in 300  $\mu$ l TRI reagent (Sigma) using an electric homogenizer (IKA labortechnik), and RNA was extracted according to the manufacturer's instructions. cDNA synthesis was performed using the qScript cDNA Synthesis Kit (Quanta-BioSciences). qRT-PCR reactions (20  $\mu$ L volume) were performed using Power SYBR Green PCR Master Mix (Quanta-BioSciences) and specific primers to the examined gene. The following reaction conditions were used: 10 min at 95 °C, 40 cycles of 15 s at 95 °C, and 60 s at 60 °C. The samples were normalized to 18S as control mRNA, by change in cycling threshold ( $\Delta C_T$ ) method and calculated based on  $2^{-\Delta\Delta C_T}$ .

## **Parabiosis**

8-week-old female CD45.2<sup>+</sup> and CD45.1<sup>+</sup> B6 mice were matched for body weight, housed in the same cage for 2 weeks, and then surgically attached for 2 or 6 weeks. Blood exchange was confirmed 14 days after parabiosis by examination of neutrophils and monocytes cell

chimerism via flow cytometry. Oral and skin tissues were collected 2 or 6 weeks after the surgery for assessing the chimerism of  $\gamma\delta$  T cells.

### **Conditional ablation of $\gamma\delta$ T cells *in vivo***

*Tcrd*-GDL and control mice were treated once intraperitoneally with 1  $\mu$ g DT (Sigma-Aldrich) in 150  $\mu$ l PBS whereas control mice received PBS only. For prolonged ablation of  $\gamma\delta$ T cells, the mice were injected once with 1  $\mu$ g DT and then with 0.6  $\mu$ g on a weekly basis.

### **Chimeric mice**

8-week-old recipient CD45.2<sup>+</sup> B6 mice were lethally irradiated with 950 rad and 24h later the mice were injected intravenously with  $5 \times 10^6$  bone marrow cells obtained from congenic CD45.1<sup>+</sup> B6 mice to allow identification of donor-derived cells. The presence of donor- and host-derived LCs in the examined tissue was evaluated at different time points after transplantation. The chimerism was examined in the blood, gingiva and ear skin as indicated in the text.

### **BrdU incorporation Assays**

4-week-old mice were injected intraperitoneally with BrdU (2 mg/mouse; Sigma) and subsequently received BrdU (0.8 mg/ml) in autoclaved drinking water that was changed every other day. Tissues were prepared for flow cytometry analysis as described in the previous section, and intracellular staining for BrdU was performed with the BrdU Flow kit (BD) according to the manufacturer's protocol.

## **Microbiota analysis**

*Tcrd-GDL* mice were bred and maintained in house under similar conditions. At the age of 8 week-old age and sex-matched mice were randomly separated to two groups that received either DT or PBS as described earlier. To avoid any non-specific cage effects that are not related to the depletion of  $\gamma\delta$ T cell depletion, each group was kept in a single cage throughout the depletion period. The oral microbiota was collected using cotton swab for 30 seconds and DNA was extracted using the MoBio Powersoil DNA Extraction Kit according to the manufacturer's instructions. Library preparation, sequencing and analysis was performed by Hy Laboratories (Rehovot, Israel) as follows: Libraries were prepared using a two-step PCR protocol. In the first step, the V4 region of the 16S rRNA gene was amplified using primers 515F and 807R (Earth Microbiome Project). The PCR reactions were cleaned using AMPure beads, and then subjected to a second PCR using the Fluidigm Access Array Primers for Illumina to add the adaptor and index sequences. After cleaning the second PCR using AMPure beads, the libraries were quantified by Qubit and the size determined by TapeStation analysis. The libraries were then sequenced on an Illumina Miseq using the V2 kit for 500 cycles. Data analysis was performed using the CLC Bio Genomics Workbench and Microbial module referring to the Greengene database. Diversity related statistical tests were carried out in R using the following packages: vegan and phyloseq. Permutational ANOVA was used to assess significance between groups on NMDS.



### **Bone loss quantification**

Five months after constitutive ablation of  $\gamma\delta$ T cells in *Tcrd-GDL* mice, the hemi-maxillae were harvested from the mice and littermate controls and alveolar bone loss was quantified using  $\mu$ CT (Scanco Medical). Briefly, the sagittal plan of the specimens was set parallel to the X-ray beam axis. The specimens were scanned at a resolution of 12  $\mu$ m in all three spatial dimensions. The scans were Gaussian-filtered and segmented using a multilevel global thresholding procedure for the segmentation of enamel, dentin, and bone. Residual alveolar bone volume was determined separately for either root (bucco-mesial and bucco-distal) using a direct 3D approach. The apical basis of the measured volume was set mesio-distally parallel to the cemento-enamel junction (CEJ) and bucco-palatinally parallel to the occlusal plane. The results represented the residual bone above the reference plane in millimeters cubed.

## Supplementary Figures

a epidermal  $\gamma\delta$  T cells in ear skin

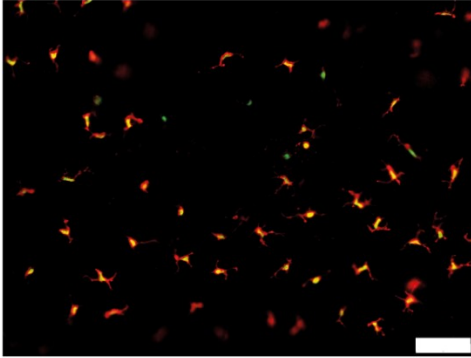

b intraepithelial gingival  $\gamma\delta$  T cells

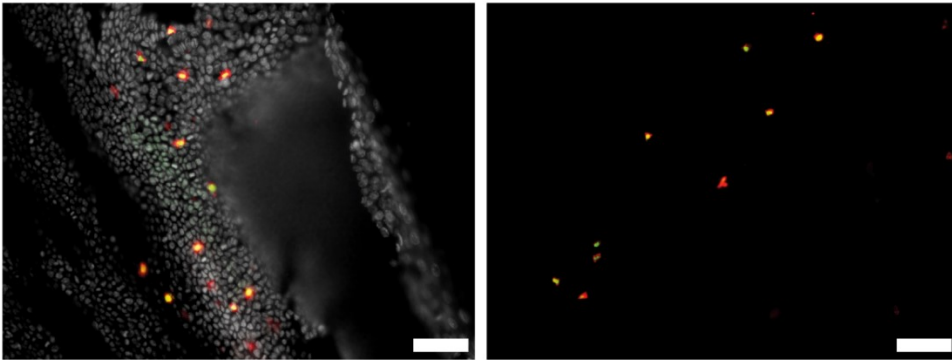

### Figure S1: Cell morphology of intraepithelial $\gamma\delta$ T cells

(a-b) Immunofluorescence whole mount staining of ear epidermal sheets and gingival epithelial sheets of *TcrdH2BeGFP* mice. CD3 signal (red) indicates the dendritic-like shape of epidermal  $\gamma\delta$ T cells (green) (a) versus round shaped intraepithelial  $\gamma\delta$ T cells in the gingiva (b). Cell nuclei are dyed with DAPI (grey) (*b left*). Scale bar represents 50  $\mu$ m.

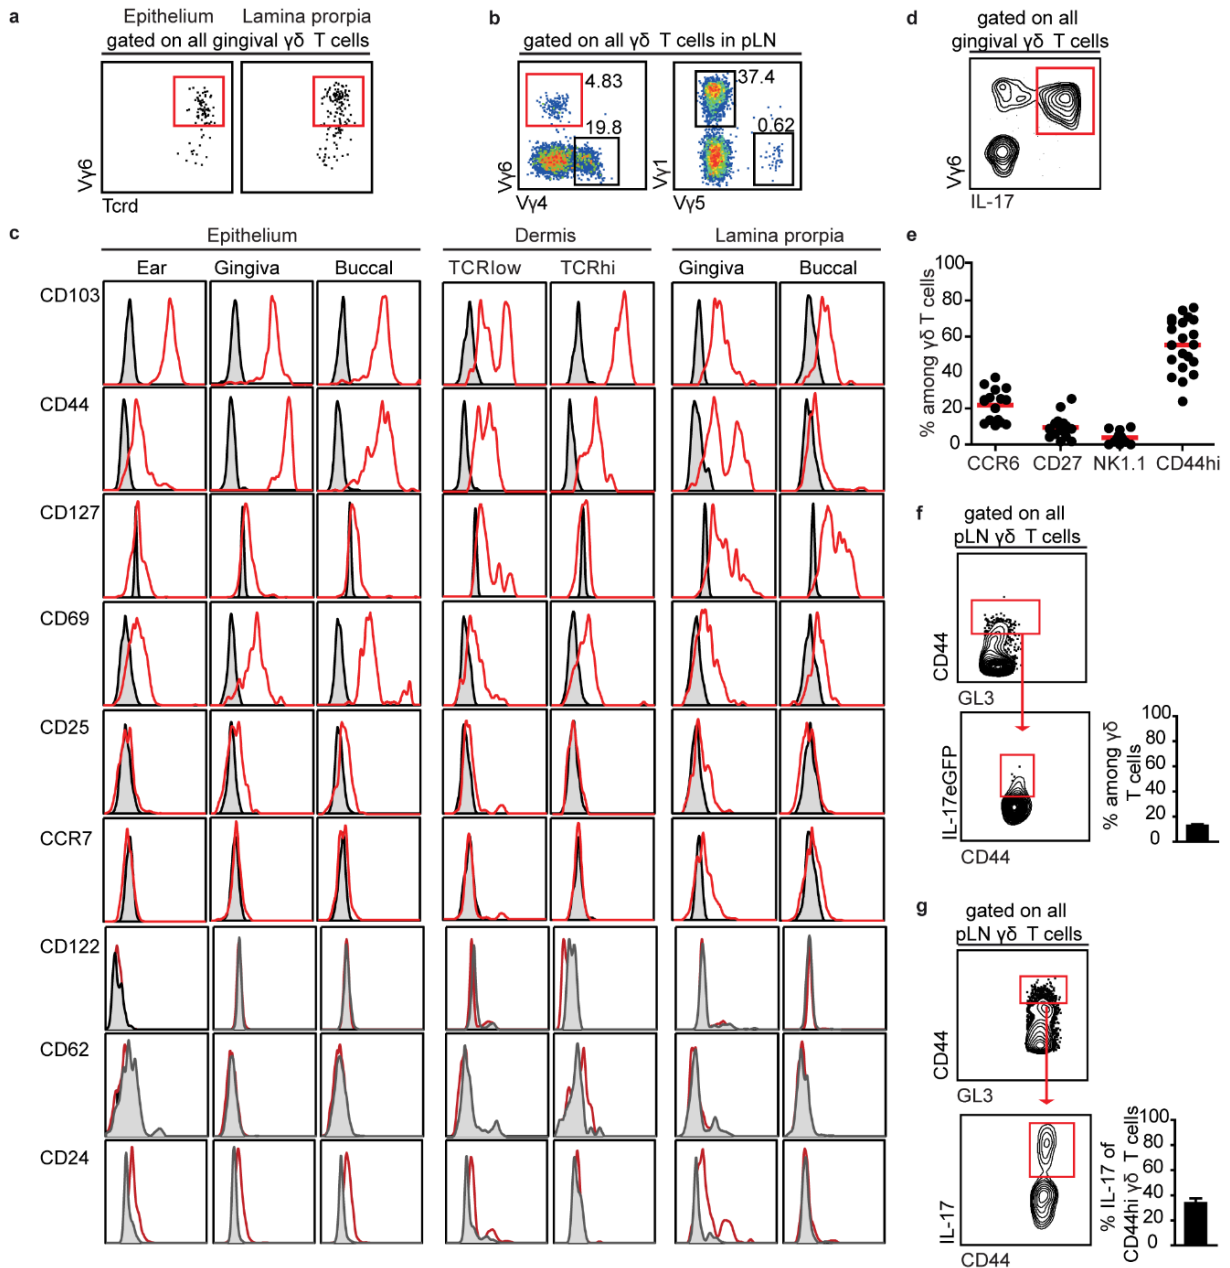

**Figure S2: Extended phenotypic analysis of  $\gamma\delta$ T cells**

(a) Representative dot plots of flow cytometry analysis show the presence of  $V\gamma 6^+$   $\gamma\delta$ T cells in gingival epithelium and lamina propria extracted from *TcrdH2BeGFP* mice (n=4 mice). (b)  $V\gamma$  subsets of peripheral lymph nodes were analyzed by flow cytometry. Representative dot plots of at least two independent experiments (n= 4 mice) are shown.

(c) Expression of various surface markers on  $\gamma\delta$ T cells isolated either from the epidermis/epithelium or dermis/ lamina propria of ears, gingival tissues and buccal tissues were analyzed by flow cytometry. Grey histograms represent isotype controls. Data representative of 2 independent experiments are provided (n=5 mice in each experiment).

(d) Representative contour plot of gingival V $\gamma$ 6<sup>+</sup>  $\gamma\delta$ T cells against IL-17 (n=4 mice). (e) Flow cytometry results presenting the frequencies of CCR6<sup>+</sup>, CD27<sup>+</sup>, NK1.1<sup>+</sup> and CD44<sup>hi</sup>  $\gamma\delta$ T cells isolated from the gingiva of *TcrdH2BeGFP* mice. One dot represents one mouse. Results from 3 to 4 independent experiments are shown. (f-g) Peripheral lymph node cells were isolated either from *IL17eGFP* or from *TcrdH2BeGFP* mice and analyzed by flow cytometry. (f) Representative dot plots of 1 out of 2 experiments (n= 4 mice per experiment) show *IL17eGFP*<sup>+</sup> cells among CD44<sup>hi</sup> cells. Bar graph shows the mean of pooled data. (g) Peripheral lymph node cells of *TcrdH2BeGFP* mice were stimulated *ex vivo* with PMA and ionomycin and IL-17 production among CD44<sup>hi</sup>  $\gamma\delta$ T cells was analyzed. Representative contour plots of 1 out of 3 experiments (n=7 mice) are shown. Bar graph depicts the mean + SEM of pooled data.

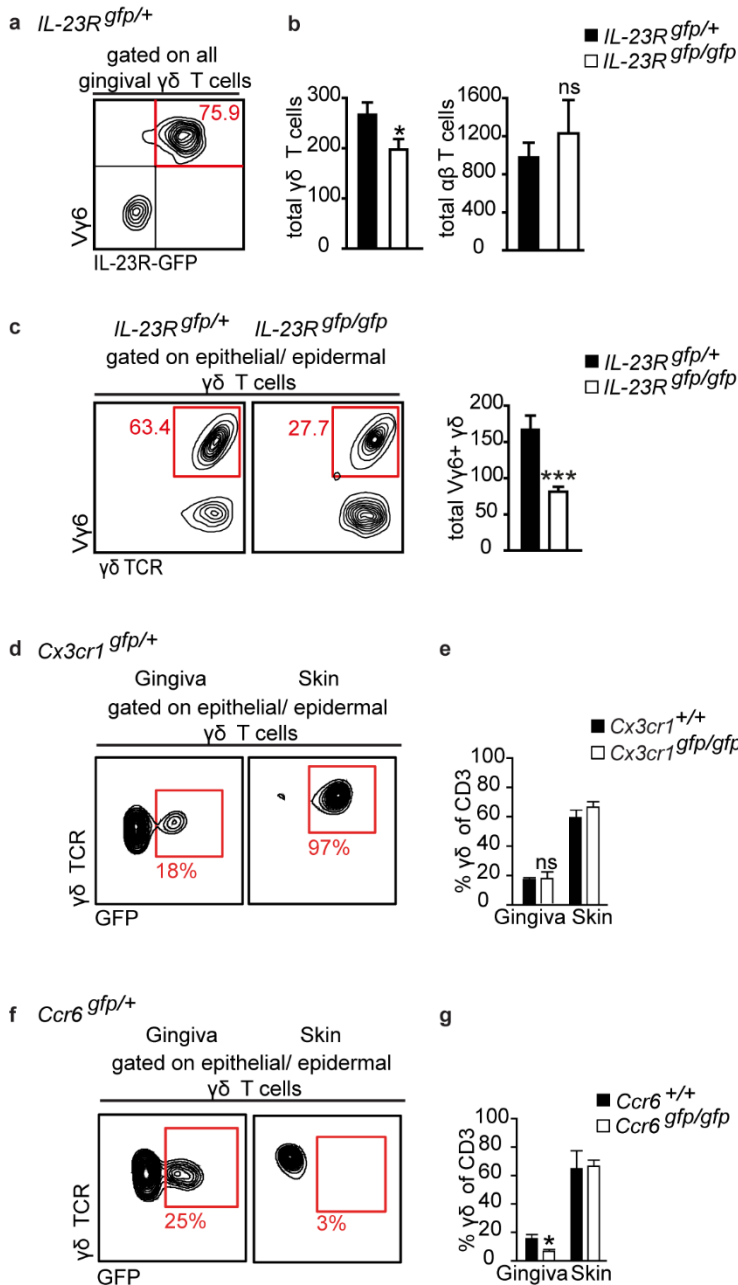

**Figure S3: Influence of IL-23R signaling chemokine receptors CX<sub>3</sub>CR1 and CCR6 on gingival  $\gamma\delta$ T cells**

(a-c) Gated gingiva  $\gamma\delta$ T cells of *IL23<sup>gfp/gfp</sup>* mice and the corresponding heterozygote and WT littermate controls. (a) Representative contour plots of one out of 3 independent

experiments indicate percentages of V $\gamma$ 6<sup>+</sup> GFP-expressing  $\gamma\delta$ T cells in *Il23r<sup>gfp/+</sup>* mice. (b) Bar graphs show the mean + SEM of total numbers of  $\gamma\delta$ T cells and  $\alpha\beta$ T cells of pooled data (n=6-9 mice per experiment). (c) Representative contour plots show frequencies of V $\gamma$ 6<sup>+</sup>  $\gamma\delta$ T cells in mice lacking IL-23R (*Il23r<sup>gfp/gfp</sup>*) and littermate control mice (*Il23r<sup>gfp/+</sup>* or *Il23r<sup>+/+</sup>*). Bar graphs show pooled data of total numbers +SEM of V $\gamma$ 6<sup>+</sup>  $\gamma\delta$ T cells from 3 independent experiments (n=6-9 mice per experiment). (d-g) Gingival and skin epithelial tissues of *Cx3cr1<sup>gfp/gfp</sup>* and *Ccr6<sup>gfp/gfp</sup>* mice and the relevant heterozygote and WT littermate controls were processed for flow cytometry analysis. (d) Representative plots demonstrate percentages of GFP-expressing  $\gamma\delta$ T cells in *Cx3cr1<sup>gfp/+</sup>* mice. (e) Bar graphs show the frequencies of intraepithelial  $\gamma\delta$ T cells in each tissue in CX<sub>3</sub>CR1 WT (*Cx3cr1<sup>+/+</sup>*) mice and mice lacking the expression of CX<sub>3</sub>CR1, presented as the mean + SEM (n=4-5 per experiment, 3 independent experiments). (f) Representative contour plots showing percentages of GFP-expressing  $\gamma\delta$ T cells in *Ccr6<sup>gfp/+</sup>* mice. (g) Frequencies of intraepithelial  $\gamma\delta$ T cells in gingiva and skin in mice expressing CCR6 (*Ccr6<sup>+/+</sup>*) compared to mice lacking this chemokine receptor (*Ccr6<sup>gfp/gfp</sup>*) presented as the mean + SEM (n=4-5 per experiment, 3 independent experiments). \*p<0.05, \*\*\*p<0.001.

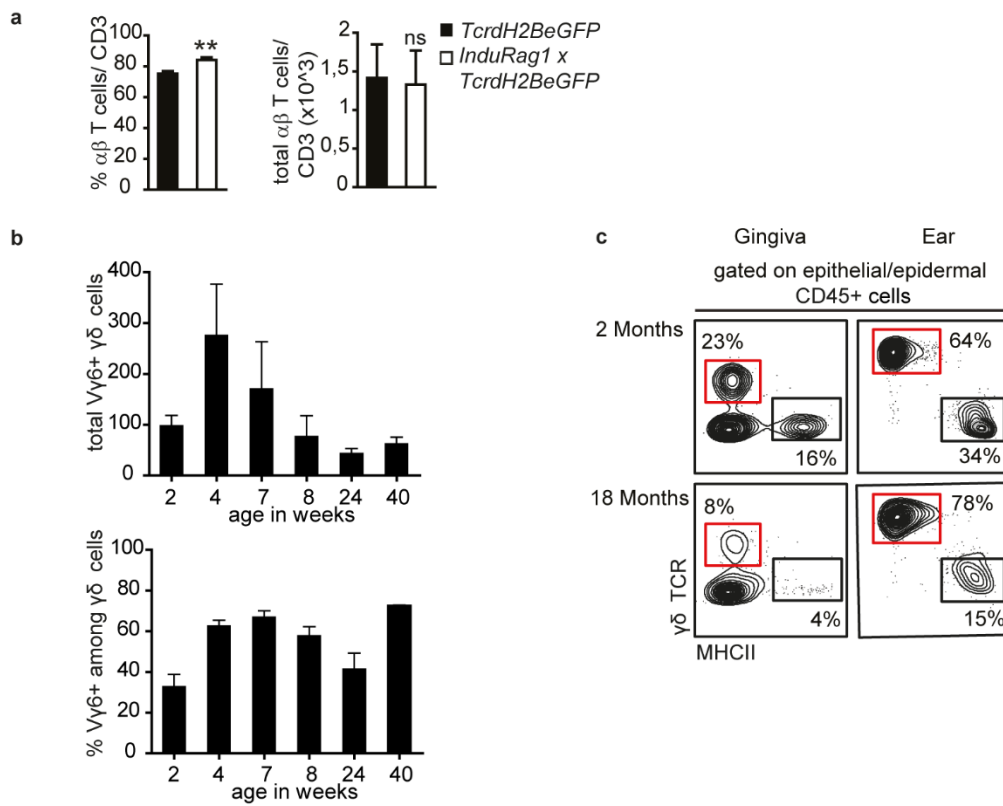

**Figure S4: Frequencies of  $\alpha\beta$  T cells in tamoxifen-treated *Indu-Rag1* $\times$ *TcrdH2BeGFP* and  $\gamma\delta$ T cells in aged mice.**

(a) Gingival tissues from *TcrdH2BeGFP* and *Indu-Rag1* $\times$ *TcrdH2BeGFP* adult mice were processed for flow cytometry analysis. Bar graphs show mean frequencies + SEM of  $\alpha\beta$  T cells among CD3<sup>+</sup> cells and total numbers + SEM of  $\alpha\beta$ T cells in gingival tissues. Data pooled from three independent experiments are shown (n= 7-8 mice per experiment). (b) Total numbers and frequencies + SEM of gingival V $\gamma$ 6<sup>+</sup>  $\gamma\delta$ T T cells were analyzed by flow cytometry in dependence of the age of *TcrdH2BeGFP* mice. Data were pooled from 3 independent experiments (n= 6-9 mice per experiment). (c)  $\gamma\delta$ T cell frequencies were analyzed in gingival epithelium and skin epidermis isolated from 2 months and 18 months

old mice. Flow cytometry plots are representative for 2 independent experiments (n= 4 mice per experiment). \*\*p<0.01.

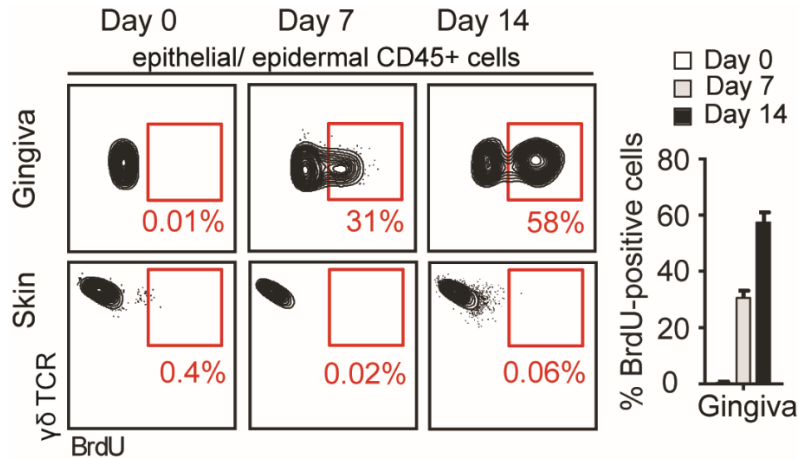

**Figure S5: Proliferation capacity of gingival  $\gamma\delta$ T cells**

Adult B6 mice were treated with BrdU in the drinking water for 2 or 4 weeks. Representative FACS plots demonstrate the frequencies of BrdU-labeled  $\gamma\delta$ T cells in the gingiva and skin epithelium at the end of the treatments. Bar graphs present the frequencies of BrdU-labeled  $\gamma\delta$ T cells in the gingiva as the mean values + SEM (n=5 mice per group). Data of 1 out of 3 independent experiments are shown.



a total  $\gamma\delta$  T cells and subsets in gingival tissue of SPF and GF mice

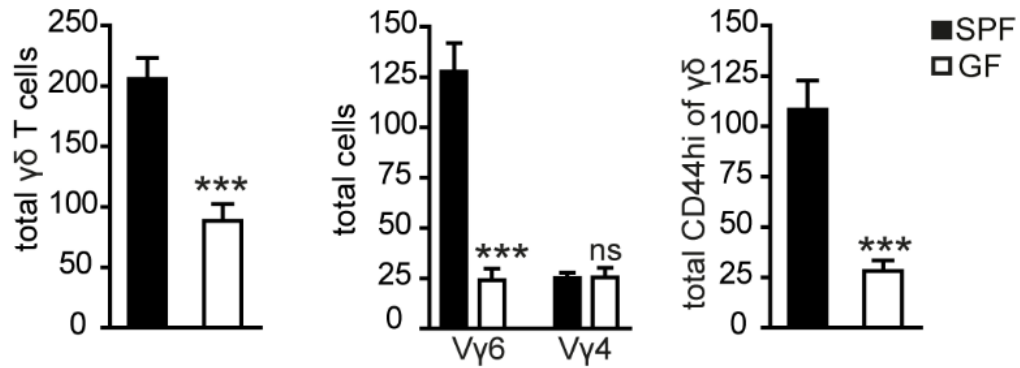

b  $\alpha\beta$  T cells in gingival tissue of SPF and GF mice

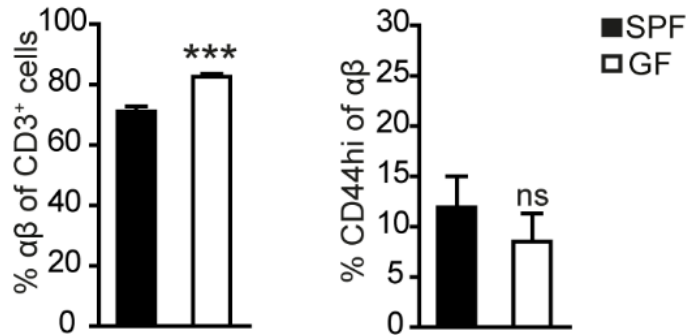

c  $\gamma\delta$  T cells in cervical lymph nodes of SPF and GF mice

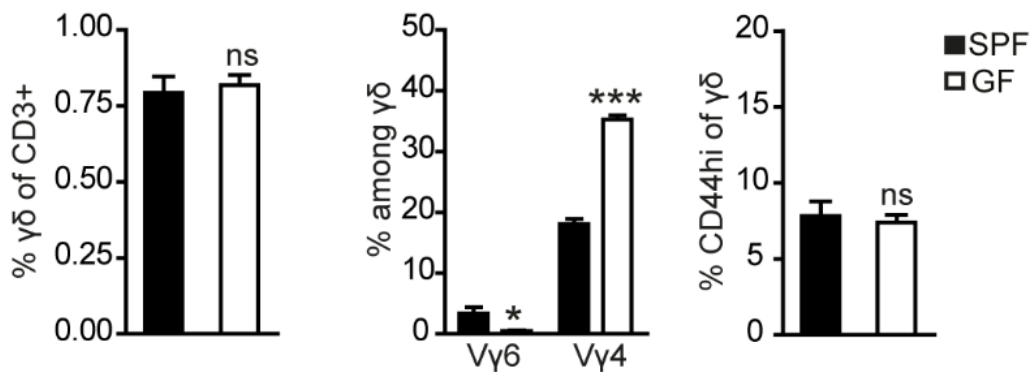

**Figure S6:  $\gamma\delta$ T cells and  $\alpha\beta$  T cells in the gingiva and cervical lymph nodes of GF and SPF mice.**

Gingival tissues and cervical lymph nodes were collected and processed from adult SPF and GF mice for flow cytometry analysis. (a) Bar graphs depict the mean values + SEM of

total numbers of  $\gamma\delta$ T cells and  $\gamma\delta$ T cell subsets (V $\gamma$ 6, V $\gamma$ 4, CD44<sup>hi</sup>) in the whole gingiva.

(b) Bar graphs show the mean values + SEM of frequencies of  $\alpha\beta$ T cells among CD3<sup>+</sup> cells and frequencies of CD44<sup>hi</sup>  $\alpha\beta$ T cells in the gingival tissue. (c) The mean values + SEM of  $\gamma\delta$ T cell frequencies among CD3<sup>+</sup> cells, V $\gamma$ 6 and V $\gamma$ 4 cells and of CD44<sup>hi</sup>  $\gamma\delta$ T cells in the cervical lymph nodes are shown in bar graphs. Data were pooled from 4 independent experiments (n=7-10 mice per experiment). \*p<0.05, \*\*\*p<0.001.

**a** Bacterial families - high abundance

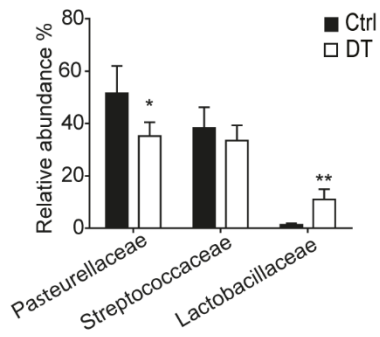

**b** Bacterial families - low abundance

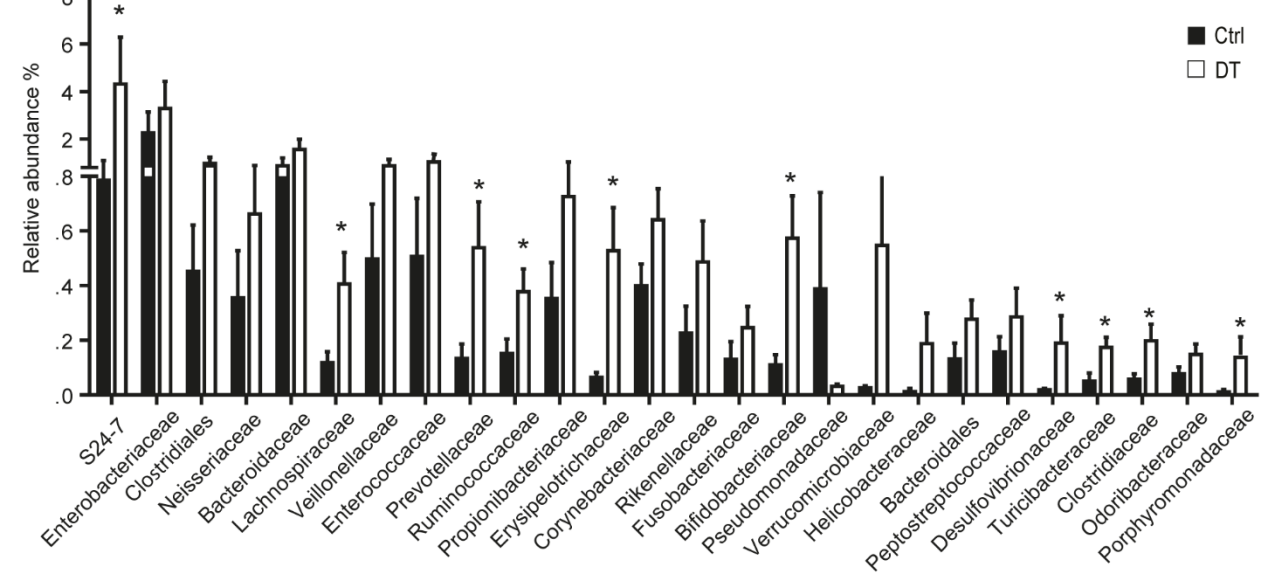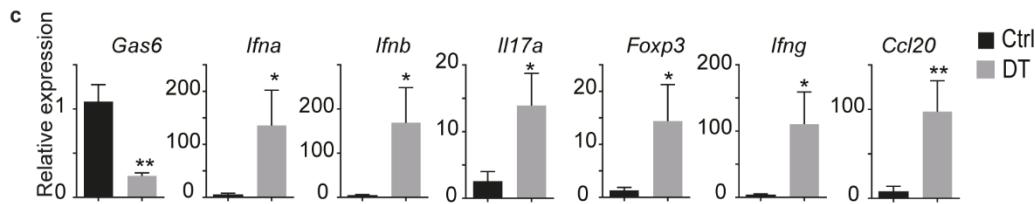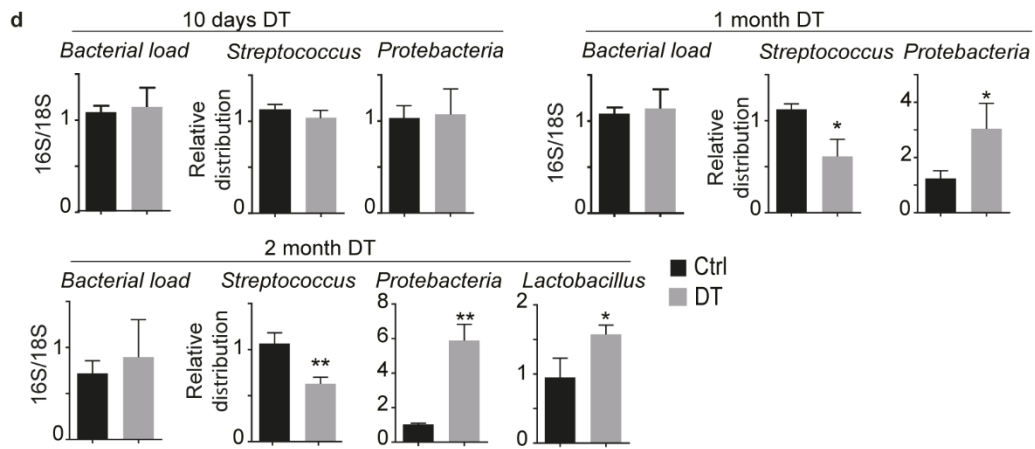

**Figure S7:** Gene expression and microbial analysis in DT versus PBS-treated *Tcrd-GDL* mice.

Oral swabs sampled from *Tcrd-GDL* mice treated with DT on a weekly basis for 5 months to induce prolonged ablation of  $\gamma\delta$ T cells were collected and subjected to taxonomic analysis. Changes in the relative frequencies of high-abundance (a) and low-abundance (b) bacterial families are presented. Mean values are representative of two independent experiments + SEM (n = 7-8 mice per group). (c) Gingival tissues were collected from *Tcrd-GDL* mice treated with DT for 10 days and processed for qRT-PCR analysis. Relative expression of the indicated genes in DT treated and control mice depicted as the mean values + SEM (n = 6). (d) Oral microbiota were sampled using swabs from DT and PBS-treated mice either 10 days, 1 month or 2 months after the treatment was initiated. Bacterial load and the relative distribution of various bacterial families in DT-treated mice and control group presented as the mean values + SEM (n=6). \*p<0.05, \*\*p<0.01.

### Supplementary Video

**Movie 1: *In vivo* two-photon imaging of the incisors' gingival tissue of *TcrdH2BeGFP* mice**

Top view of the gingival tissue of the incisors.  $\gamma\delta$ T cells are shown in green (eGFP). The second harmonic signal indicating collagen structures appears in cyano blue. Time frame: 40 min. Scale bar represents 70  $\mu$ m.

## Supplementary References

1. Prinz I, *et al.* (2006) Visualization of the earliest steps of gammadelta T cell development in the adult thymus. *Nat Immunol* 7(9):995-1003.
2. Duber S, *et al.* (2009) Induction of B-cell development in adult mice reveals the ability of bone marrow to produce B-1a cells. *Blood* 114(24):4960-4967.
3. Haas JD, *et al.* (2012) Development of interleukin-17-producing gammadelta T cells is restricted to a functional embryonic wave. *Immunity* 37(1):48-59.
4. Awasthi A, *et al.* (2009) Cutting edge: IL-23 receptor gfp reporter mice reveal distinct populations of IL-17-producing cells. *J Immunol* 182(10):5904-5908.
